# Supplementary material for: Design and synthesis of hyperbranched polyimide containing multi-triphenylamine moieties for memory devices
Source: Royal Society of Chemistry journal article supplement (doi:10.1039/c6ra20353a), 2016-01-01
Supplement: c6ra20353a1.pdf [file c6ra20353a1.pdf]

## Supplementary Information

### Design and synthesis of hyperbranched polyimide containing multi-triphenylamine moieties for memory device

#### List of Contents for Supplementary Material:

---

|                                                                                    |             |
|------------------------------------------------------------------------------------|-------------|
| <b>Fig. S1.</b> FT-IR spectrum of 4-methoxy-4'-nitrodiphenylamine.....             | <i>SI-2</i> |
| <b>Fig. S2.</b> <sup>1</sup> HNMR spectrum of 4-methoxy-4'-nitrodiphenylamine..... | <i>SI-3</i> |
| <b>Fig. S3.</b> FT-IR spectra of MPNPB and MPPAB.....                              | <i>SI-4</i> |
| <b>Fig. S4.</b> <sup>1</sup> HNMR spectra of MPNPB and MPPAB. ....                 | <i>SI-5</i> |
| <b>Fig. S5.</b> The melting point of MPPAB monomer. ....                           | <i>SI-6</i> |
| <b>Fig. S6.</b> FT-IR spectrum of MPPAB-6FHBPI.....                                | <i>SI-7</i> |
| <b>Fig. S7.</b> <sup>1</sup> HNMR spectrum of MPPAB-6FHBPI.....                    | <i>SI-8</i> |

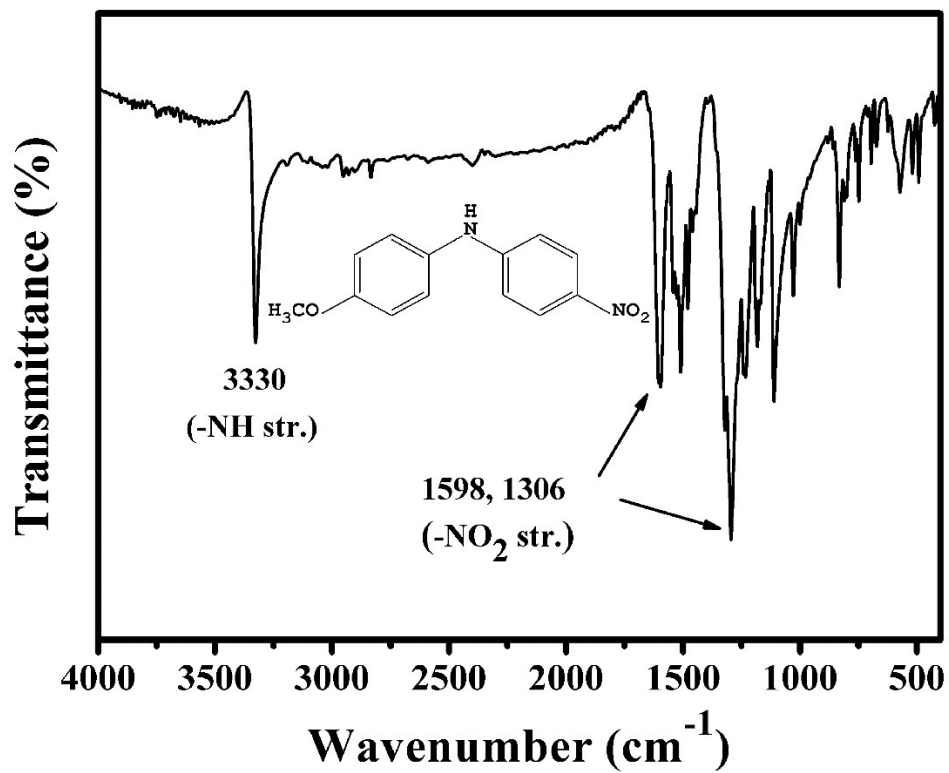

Fig. S1. FT-IR spectrum of 4-methoxy-4'-nitrodiphenylamine.

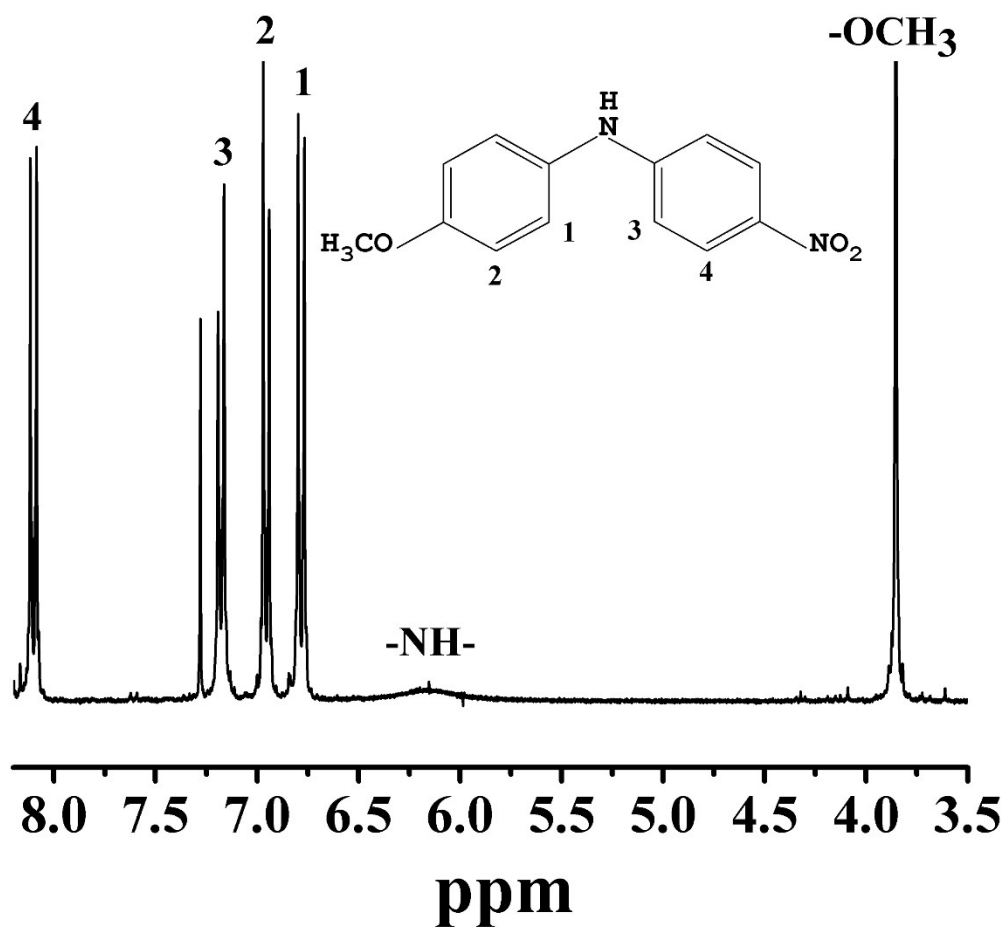

Fig. S2. <sup>1</sup>H NMR spectrum of 4-methoxy-4'-nitrodiphenylamine.

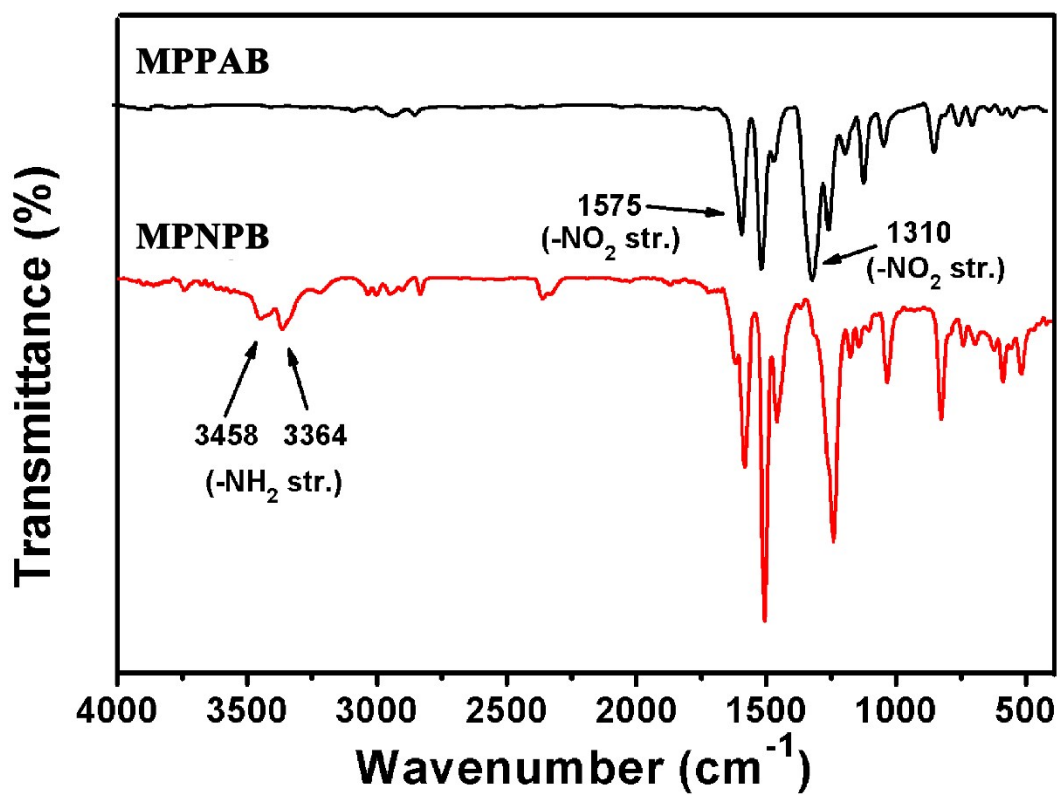

Fig. S3. FT-IR spectra of MPNPB and MPPAB.

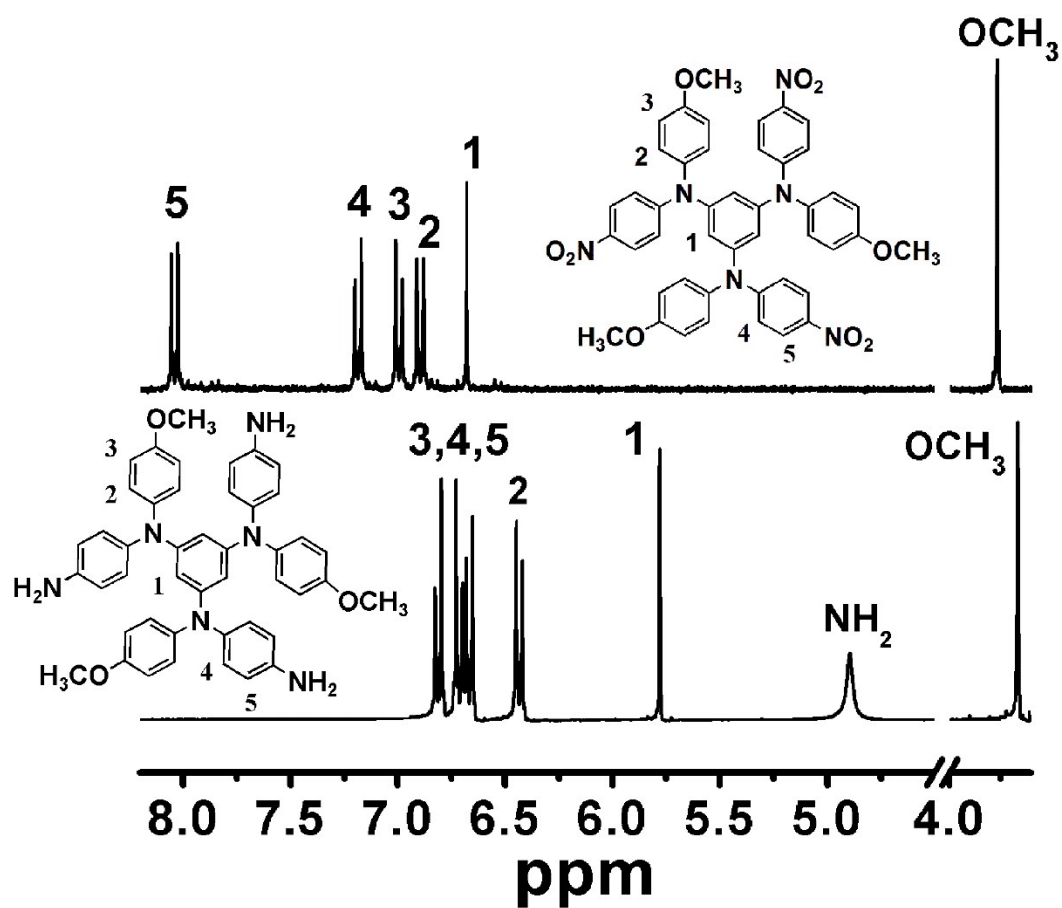

Fig. S4. <sup>1</sup>H NMR spectra of MPNPB and MPPAB.

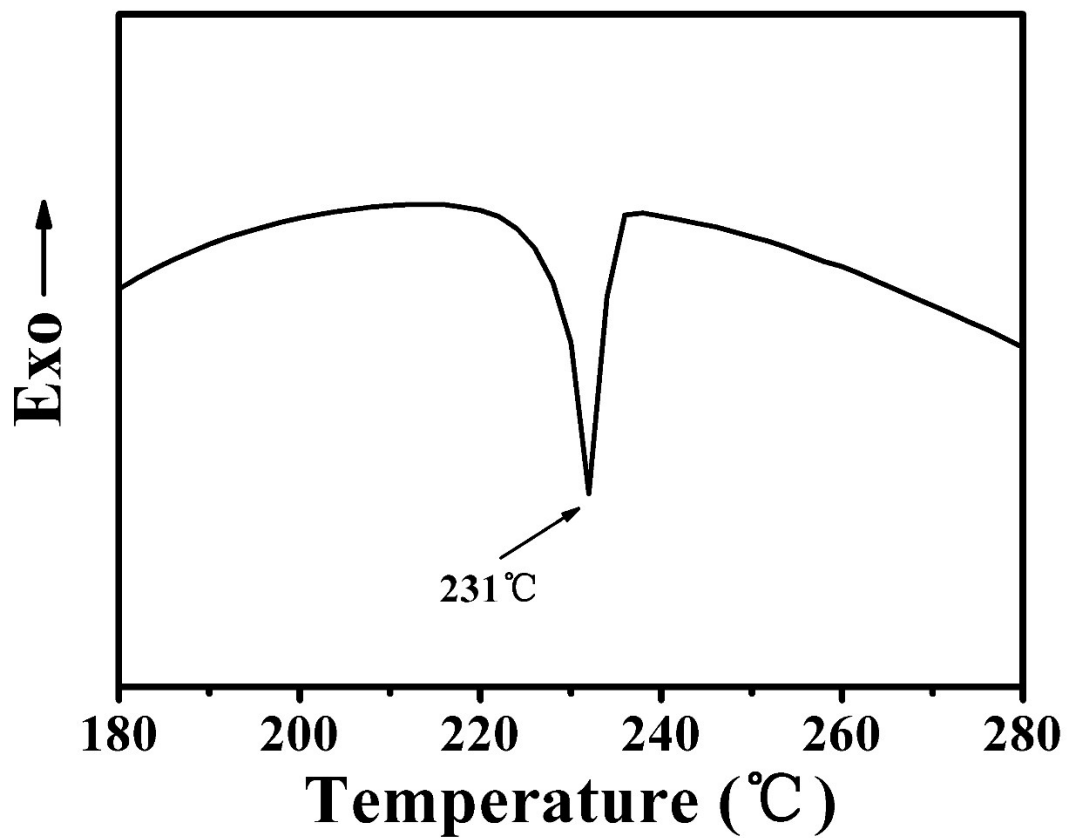

**Fig. S5.** The melting point of MPPAB monomer. The measurement was carried out at a rate of  $10\text{ }^{\circ}\text{C min}^{-1}$  under nitrogen atmosphere.

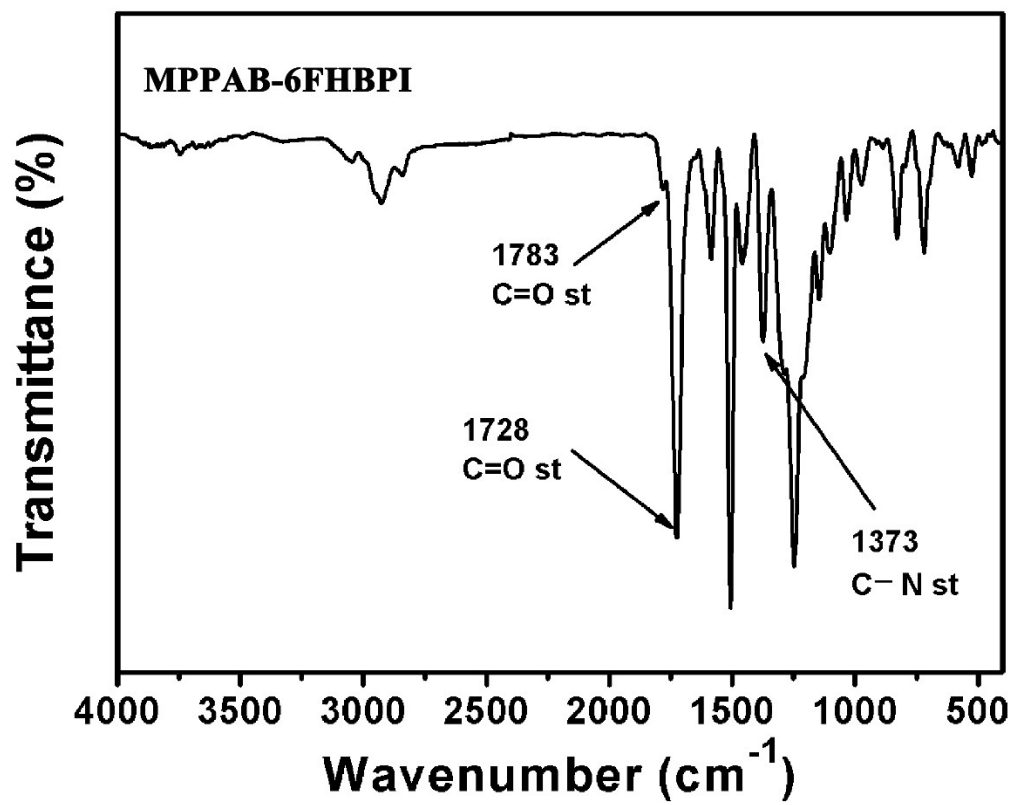

Fig. S6. FT-IR spectrum of MPPAB-6FHBPI.

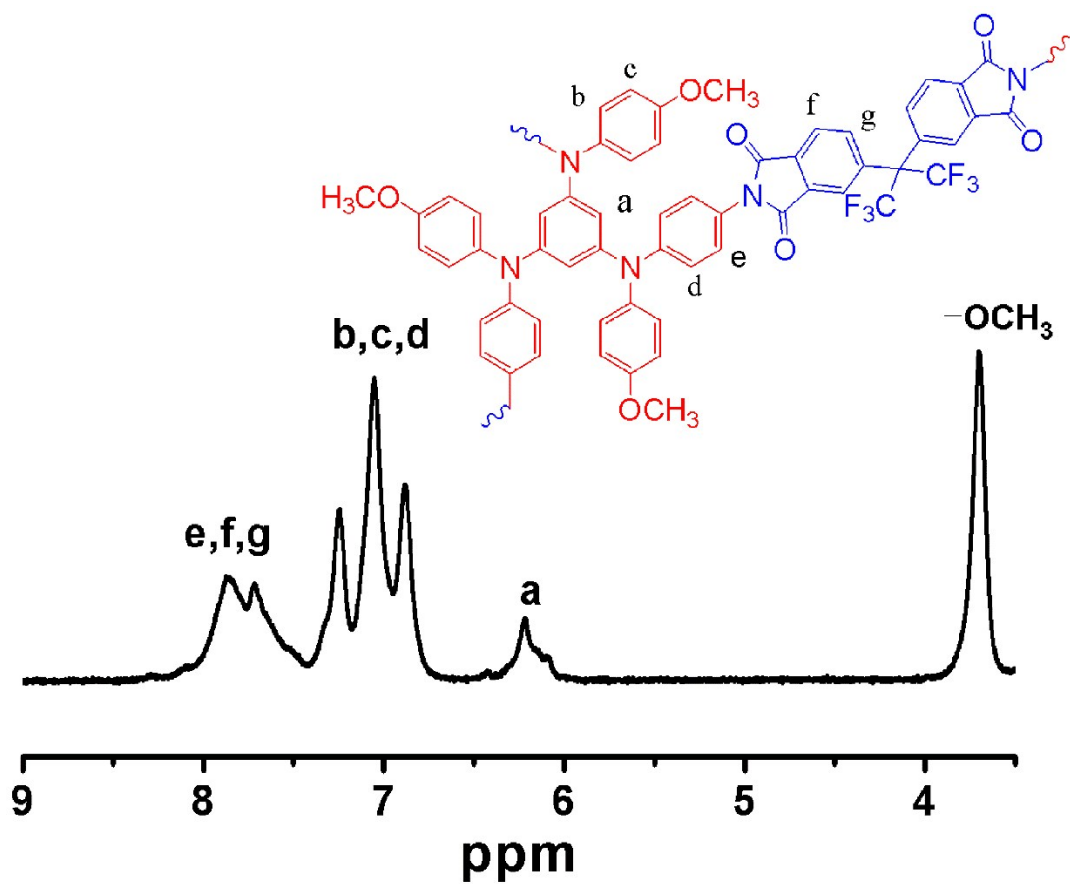

Fig. S7. <sup>1</sup>H NMR spectrum of MPPAB-6FHBPI.
